# Supplementary material for: In-House, Open-Source 3D-Software-Based, CAD/CAM-Planned Mandibular Reconstructions in 20 Consecutive Free Fibula Flap Cases: An Explorative Cross-Sectional Study With Three-Dimensional Performance Analysis
Source: PubMed Central journal article supplement (PMC8498593; doi:10.3389/fonc.2021.731336), 2021-09-24

## **Supplementary Data**

A step-by-step guide for in-house Blender-based free  
fibula flap planning

# General considerations

# Principles – fibula positioning

- Pedicle always lingually
- Facies lateralis always buccally

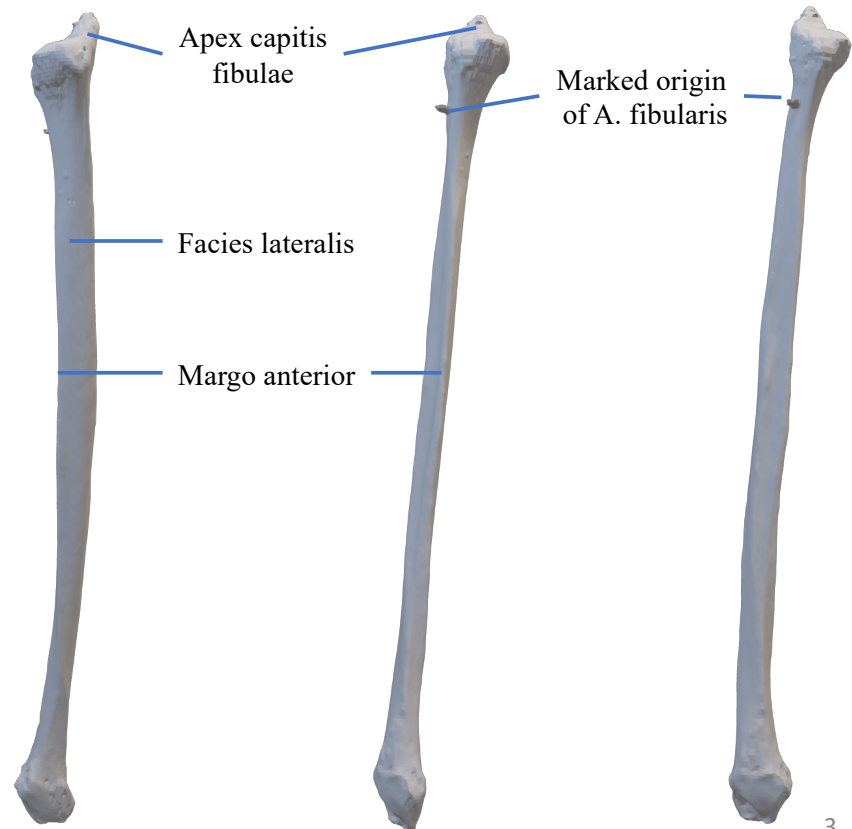

# Principles – cutting guides

- *Fibula*

- Margo anterior as guiding rim
- “dog bone like” design
- Drilling holes

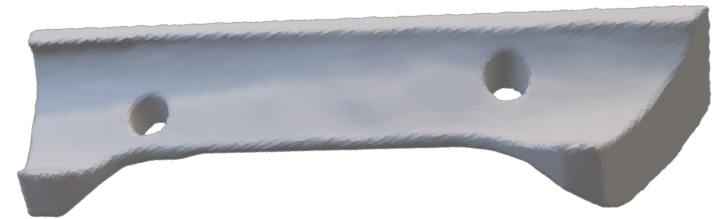

- *Mandible*

- Extraoral resection: single guides or one block guide
- Intraoral resection: block guide and slit
- Drilling holes

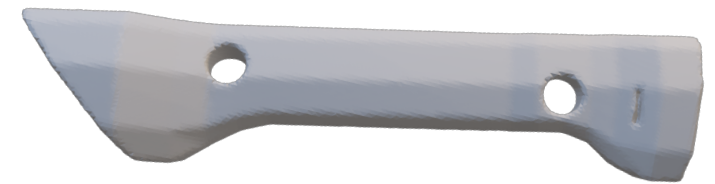



# Blender – important commands

- *Object Mode*
  - Select and deselect
  - “S” - scale
  - Add Modifier → Boolean operation → Intersect/Difference/Union
  
- *Edit Mode*
  - ctrl+R → subdivide
  - Movements of points, lines or areas

Begin planning

# Start – import

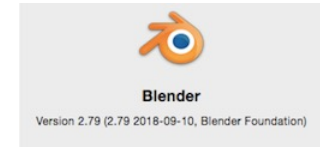

- Import STL file
- Command: Transform – Geometry to Origin

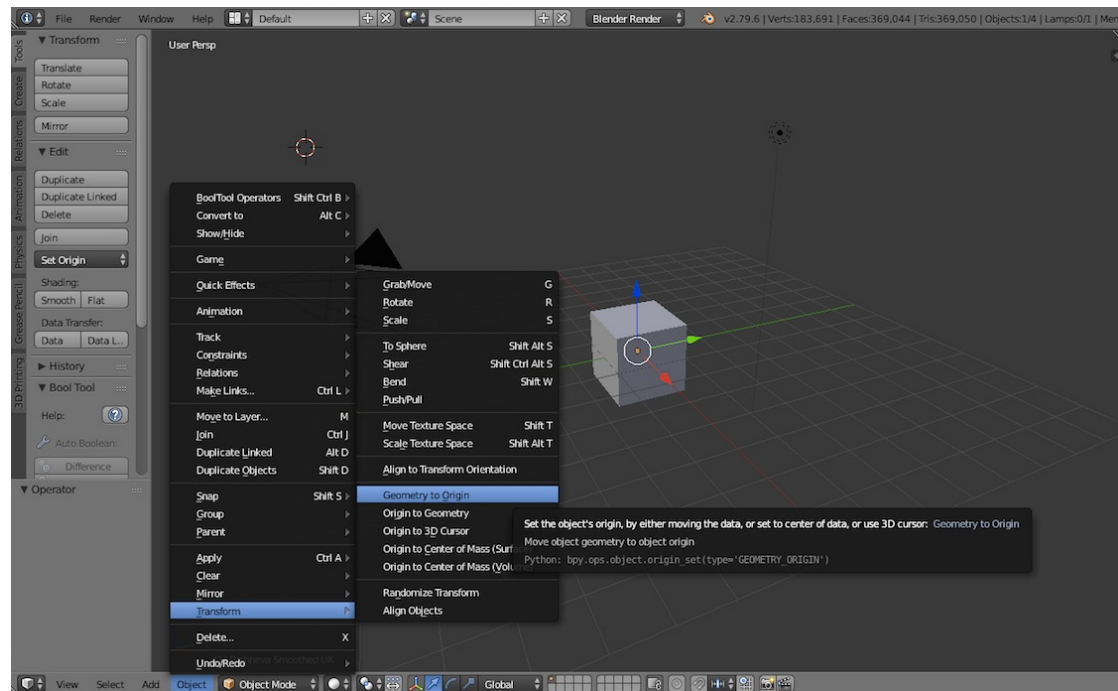

# Start – orientation

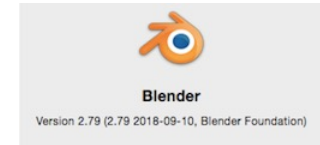

- Model orientation with Numpad numbers 1, 3 and 7

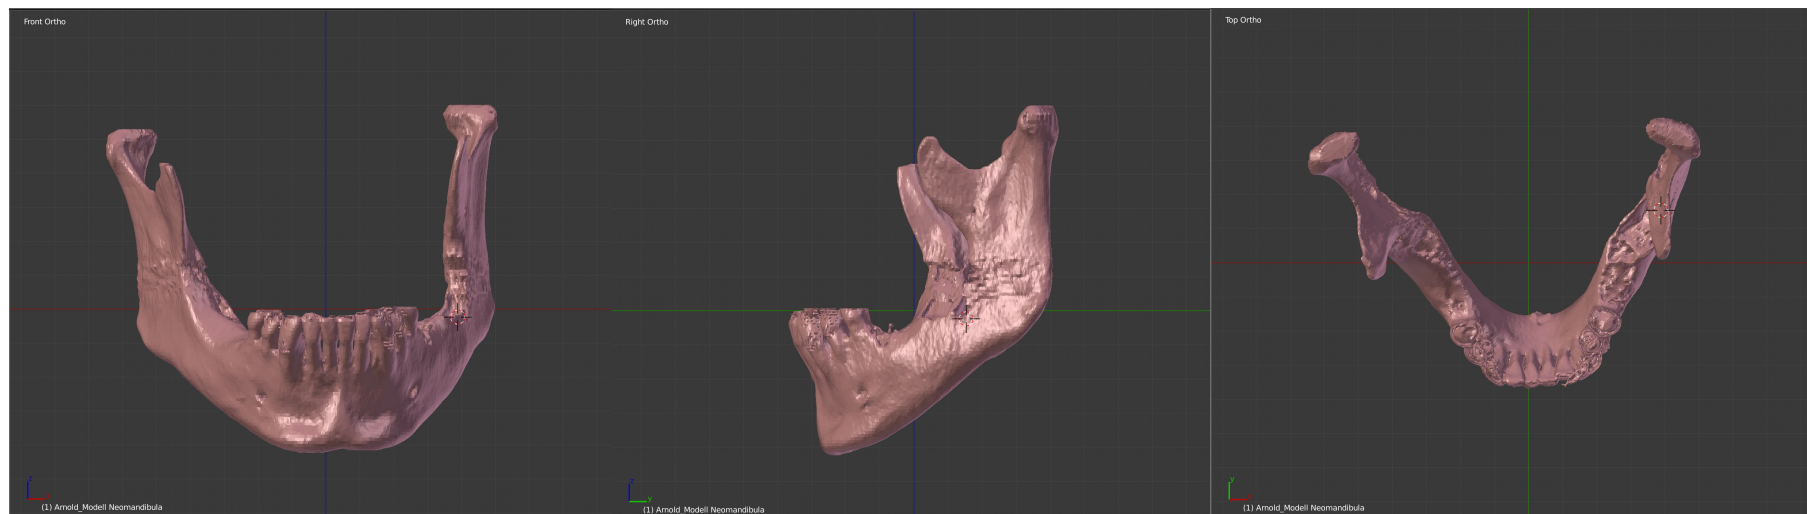

1

3

7

# Define cutting planes



- Shift+A: Add Cube
- Cube's depth 0.1 mm

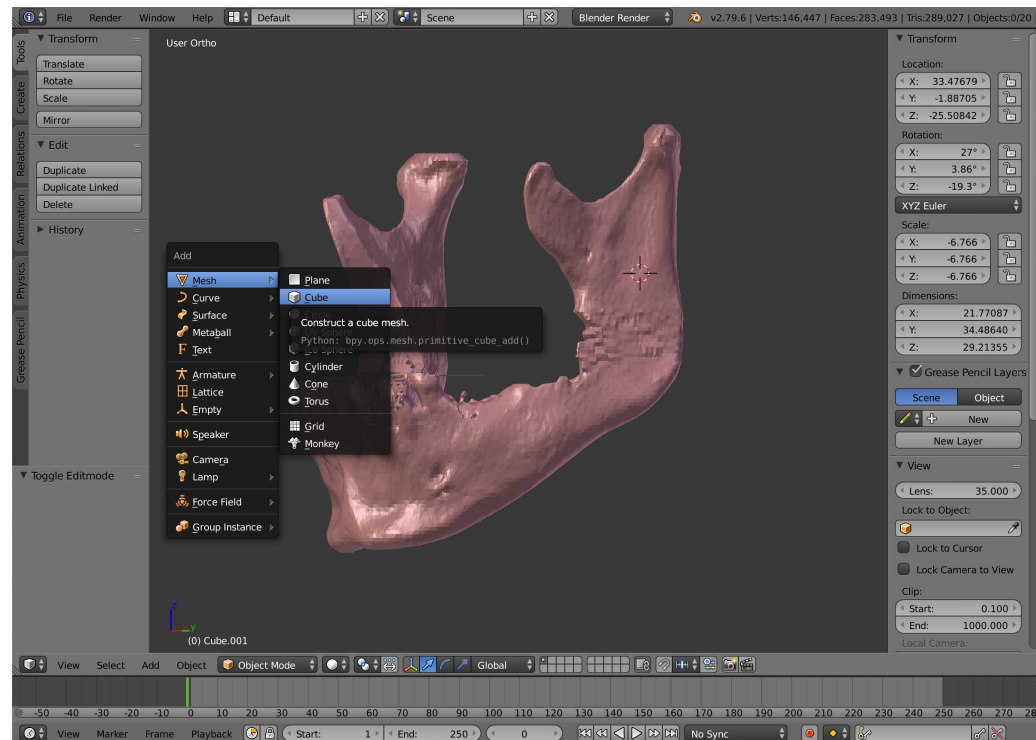

# Define cutting planes

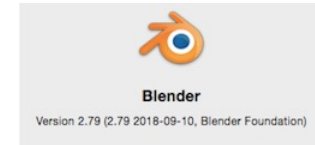

- Shift+A: Add Cube
- Cube's depth 0.1 mm
- Position cutting plane
- Duplicate cutting plane

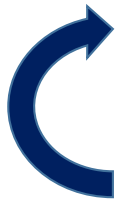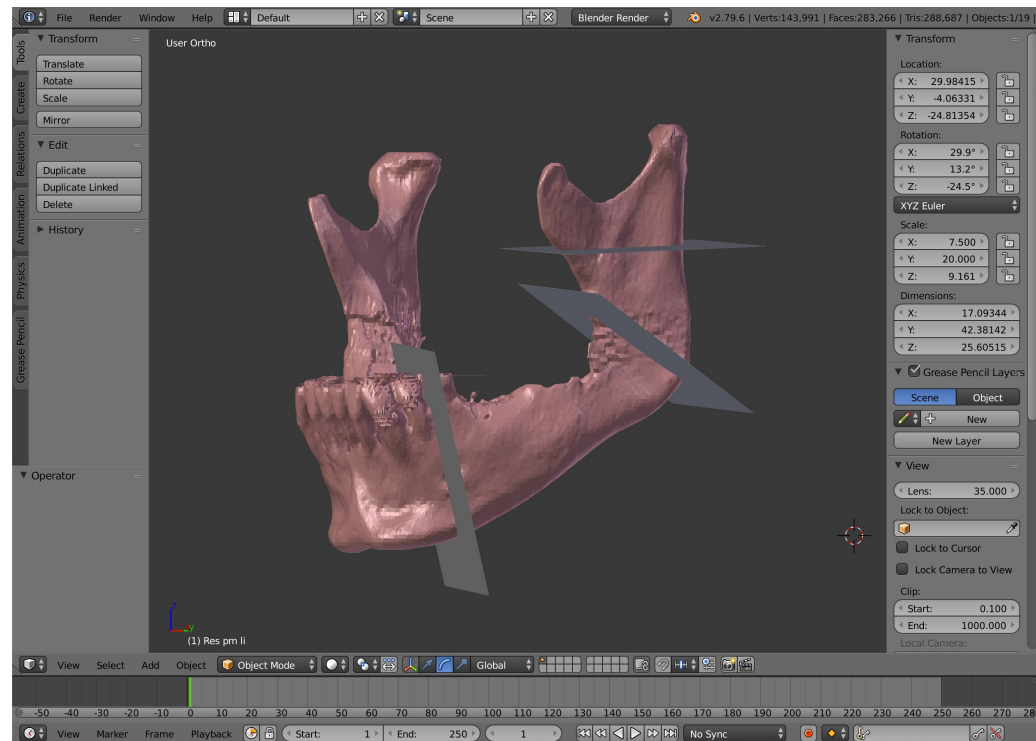

# Define fibula positions

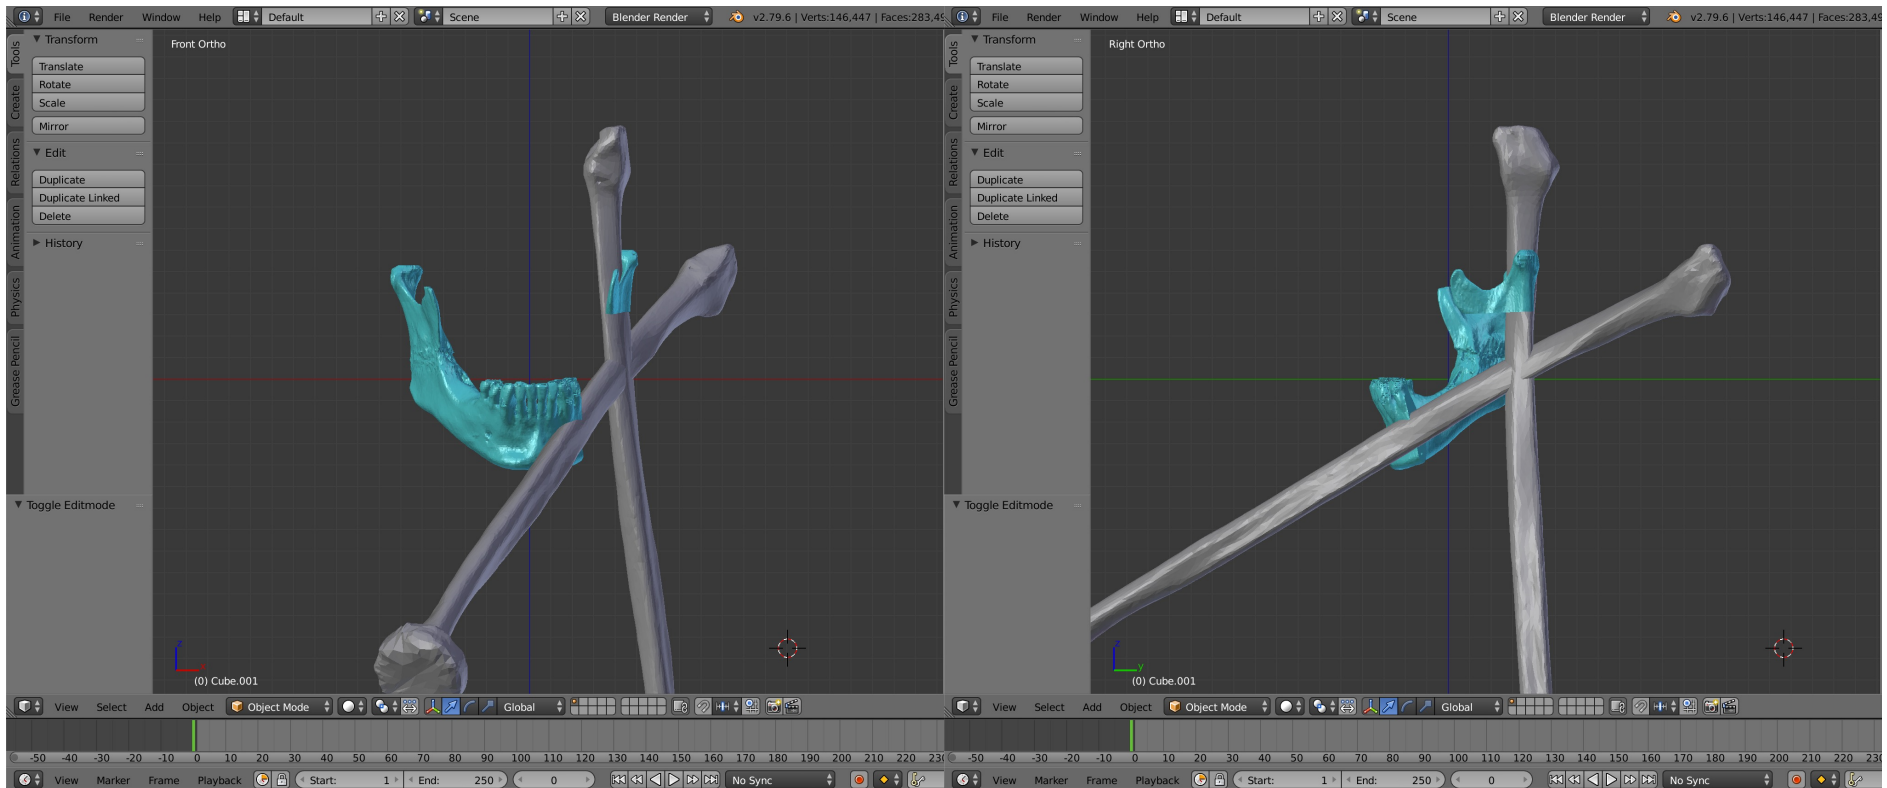

# Simulate fibula positions → Neomandibula

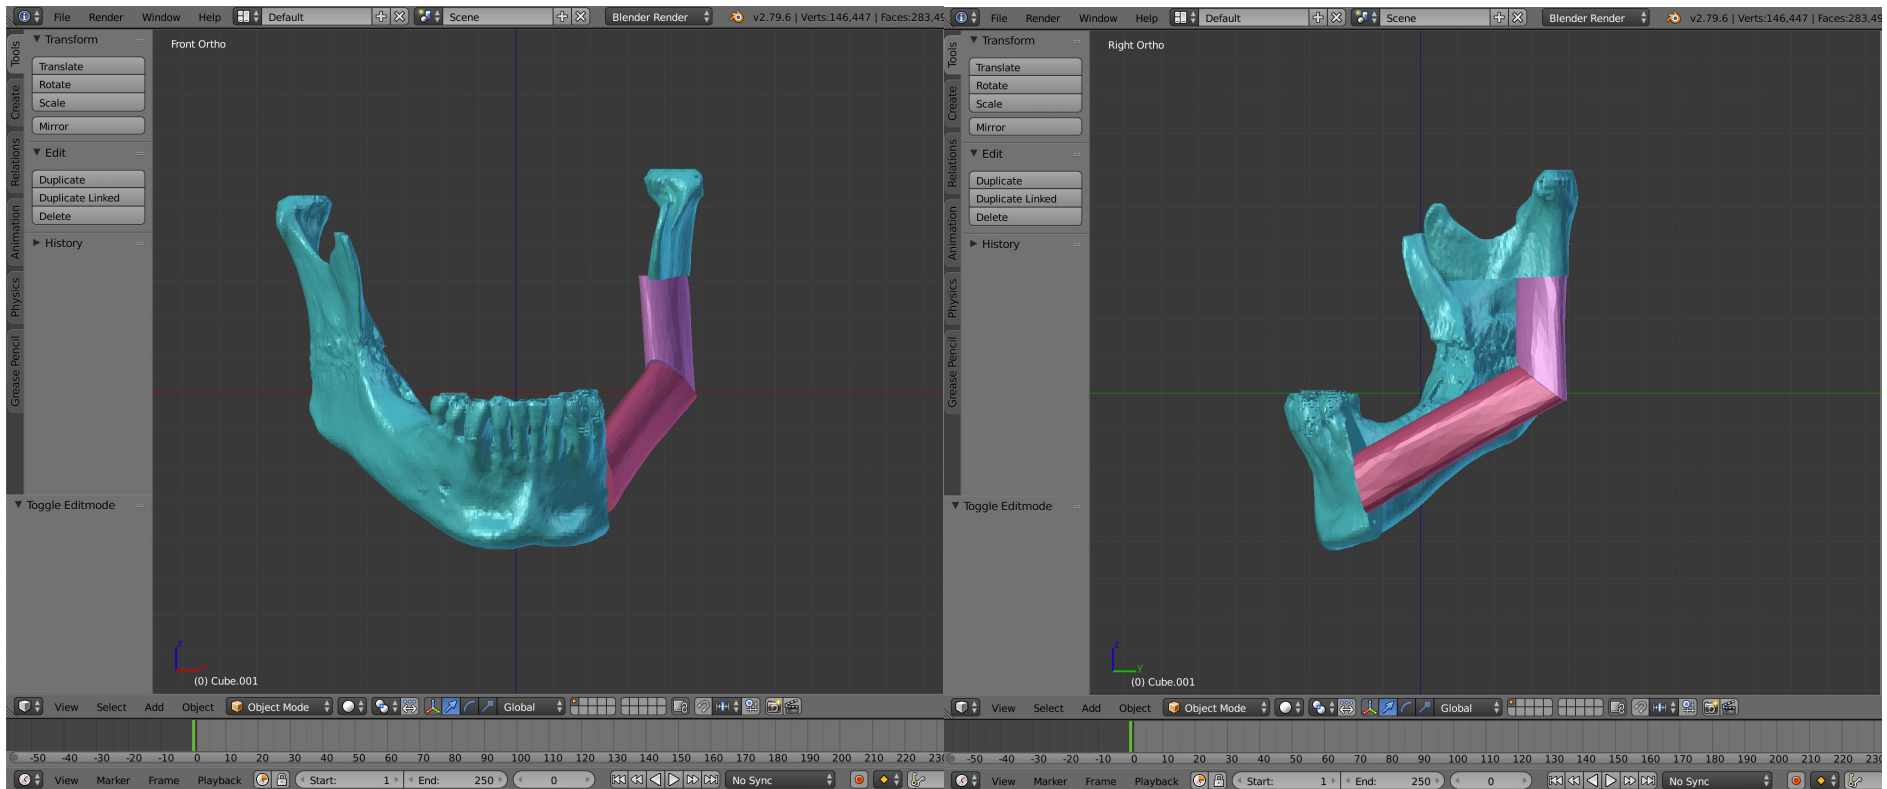



# General principles of cutting guide design

# Cutting guides – Design



- Object Mode** → *Shift+A*: add Cube
- Object Mode** → Cube orientation
- Edit Mode** → *Ctrl+R*: subdivide
- Edit Mode** → Modify form manually

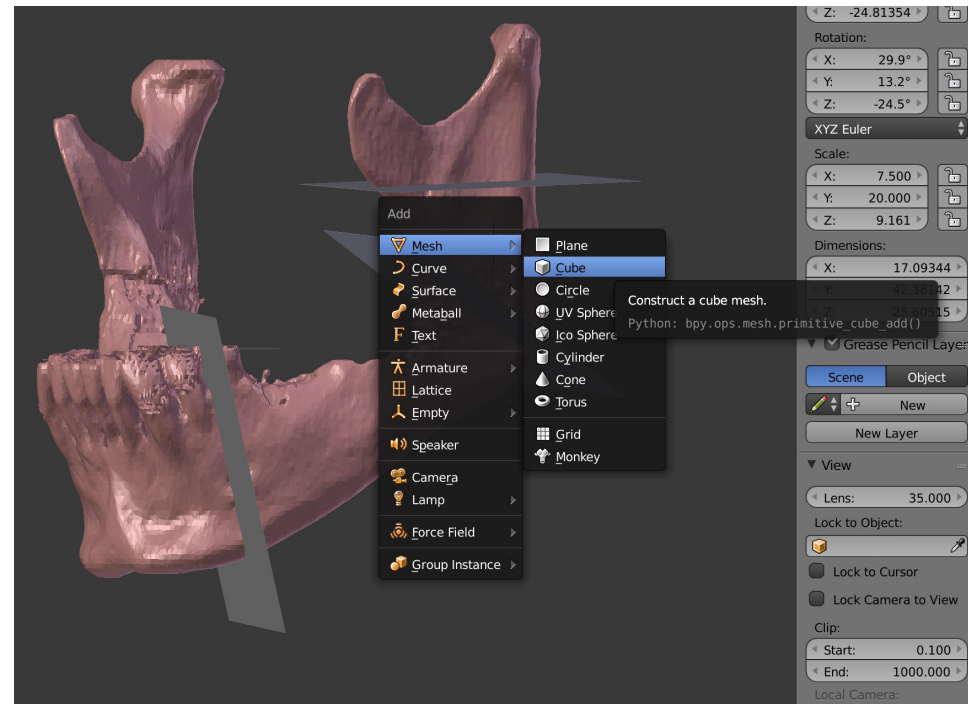

# Cutting guides – Design

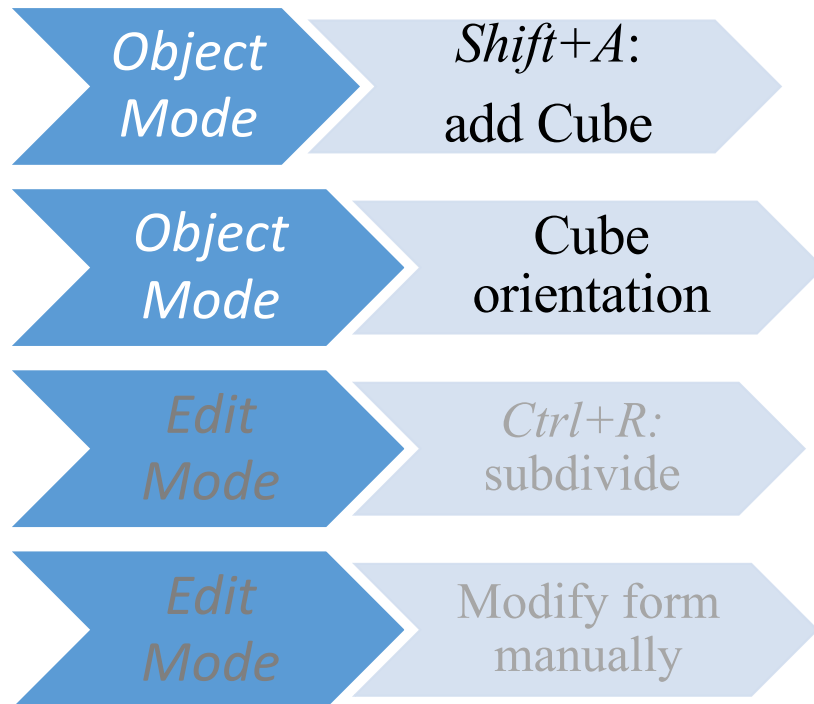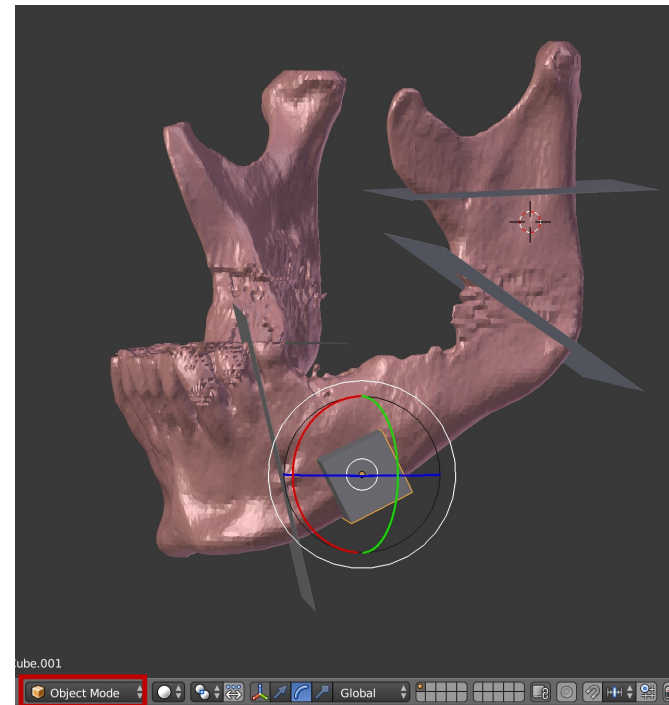

# Cutting guides – Design

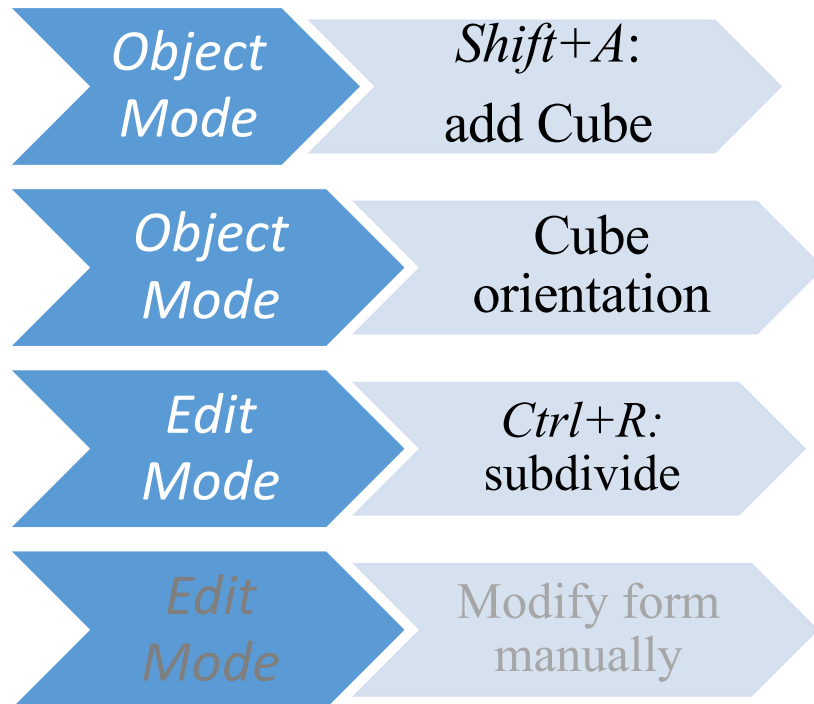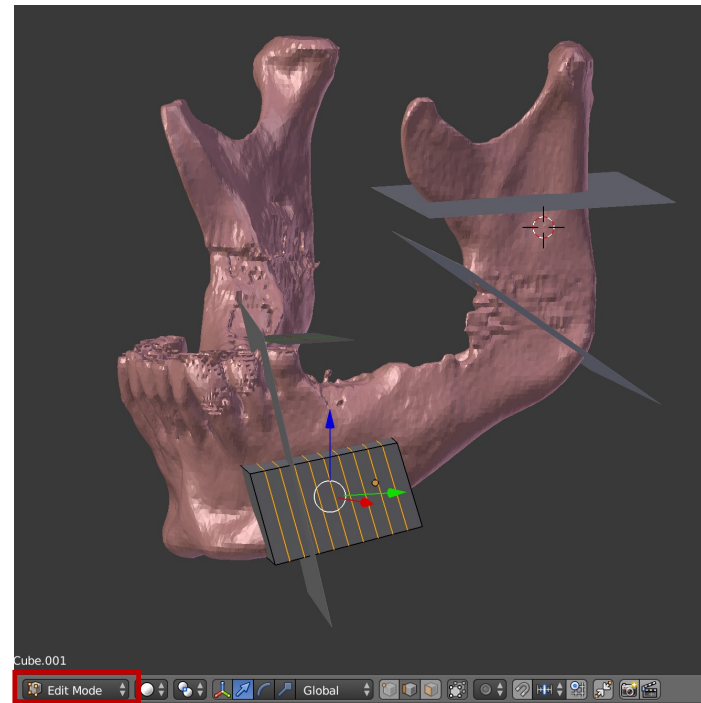

# Cutting guides – Design



- Object Mode**      *Shift+A*: add Cube
- Object Mode**      Cube orientation
- Edit Mode**      *Ctrl+R*: subdivide
- Edit Mode**      Modify form manually

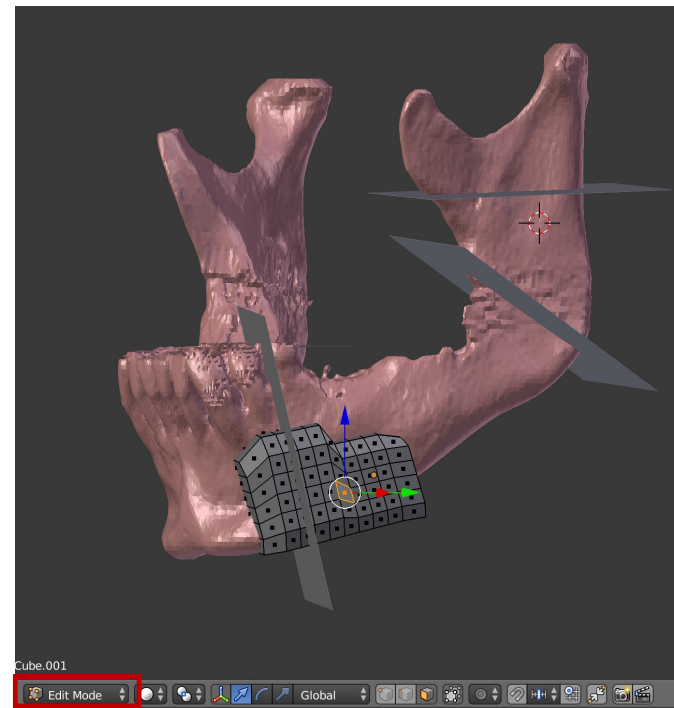

# Cutting guides – Boolean in *Object Mode*

- Mark cutting guide → *Add Modifier* → *Boolean*
- *Difference* (guide - mandible) → Apply
- Boolean operations for mandibular and fibular cutting guides

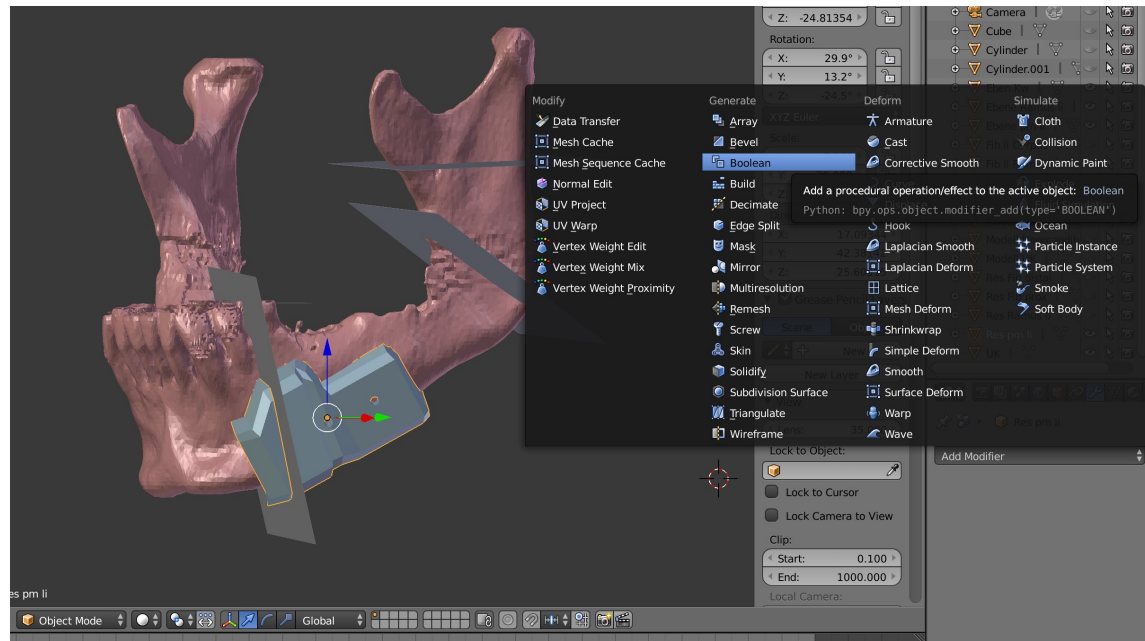

# Cutting guides – Boolean in *Object Mode*

- Mark cutting guide → *Add Modifier* → *Boolean*
- *Difference* (guide - mandible) → *Apply*
- Boolean operations for mandibular and fibular cutting guides

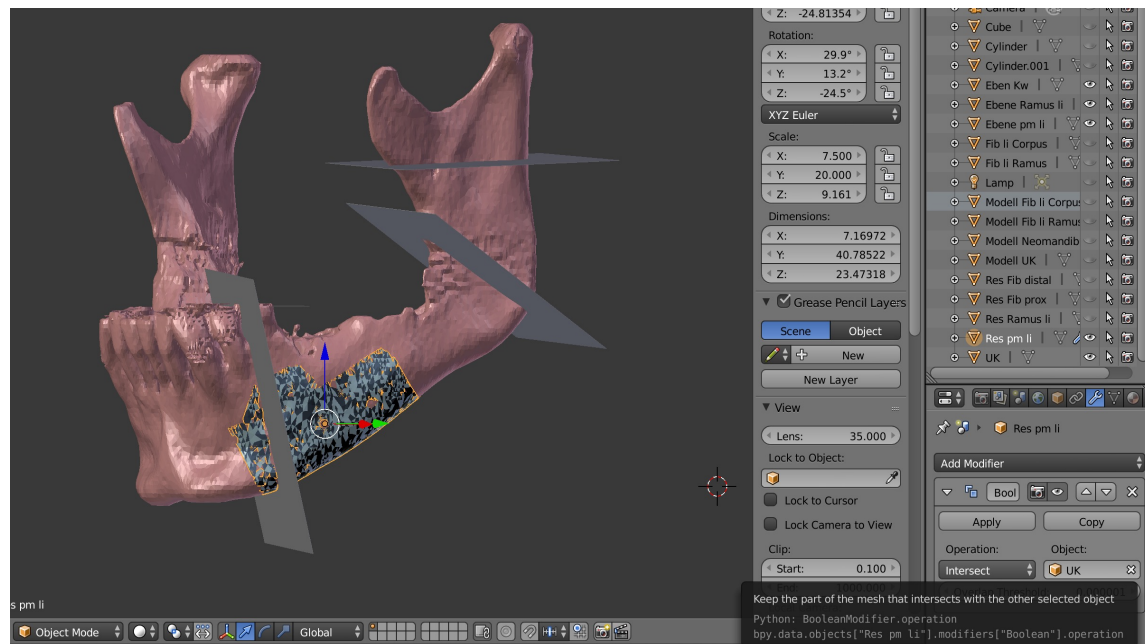

# Cutting guides – Boolean in *Object Mode*

- Mark cutting guide → *Add Modifier* → *Boolean*
- *Difference* (guide - mandible) → *Apply*
- Boolean operations for mandibular and fibular cutting guides

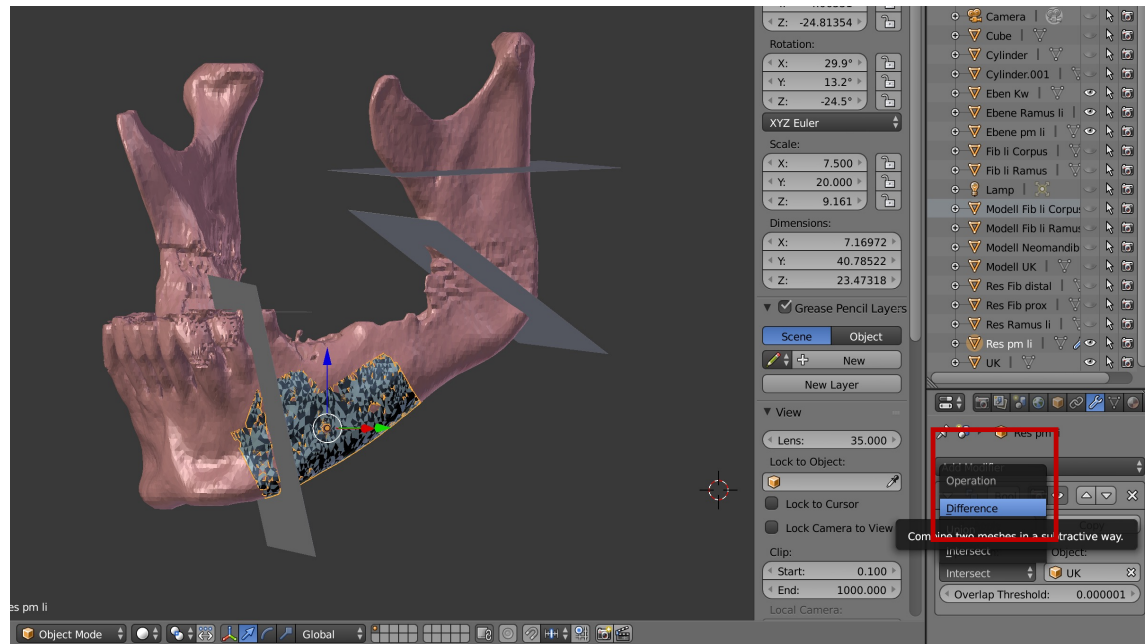



# Cutting guides – Boolean in *Object Mode*

- Mark cutting guide → *Add Modifier* → *Boolean*
- *Difference* (guide - mandible) → *Apply*
- Boolean operations for mandibular and fibular cutting guides

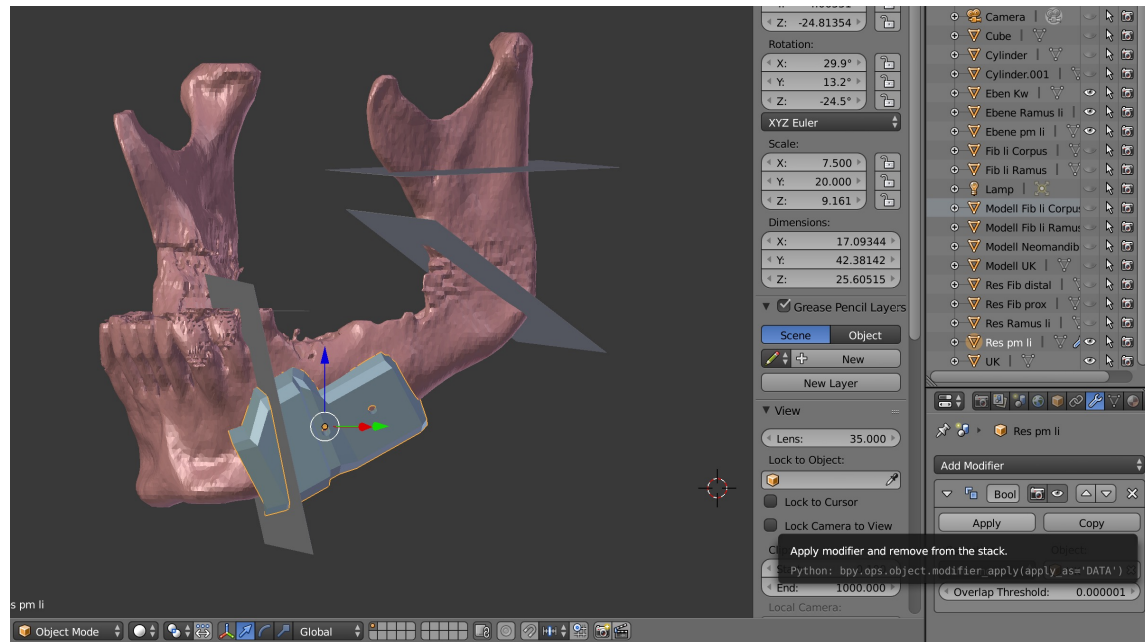

# Cutting guides – Labelling



- Shift+A – Text
- *Edit Mode*: Modify text
- Extrude
- Position
- Transform Text into Mesh:
  - Alt+C – *Curves into Mesh*
- Boolean: Difference guide-text mesh

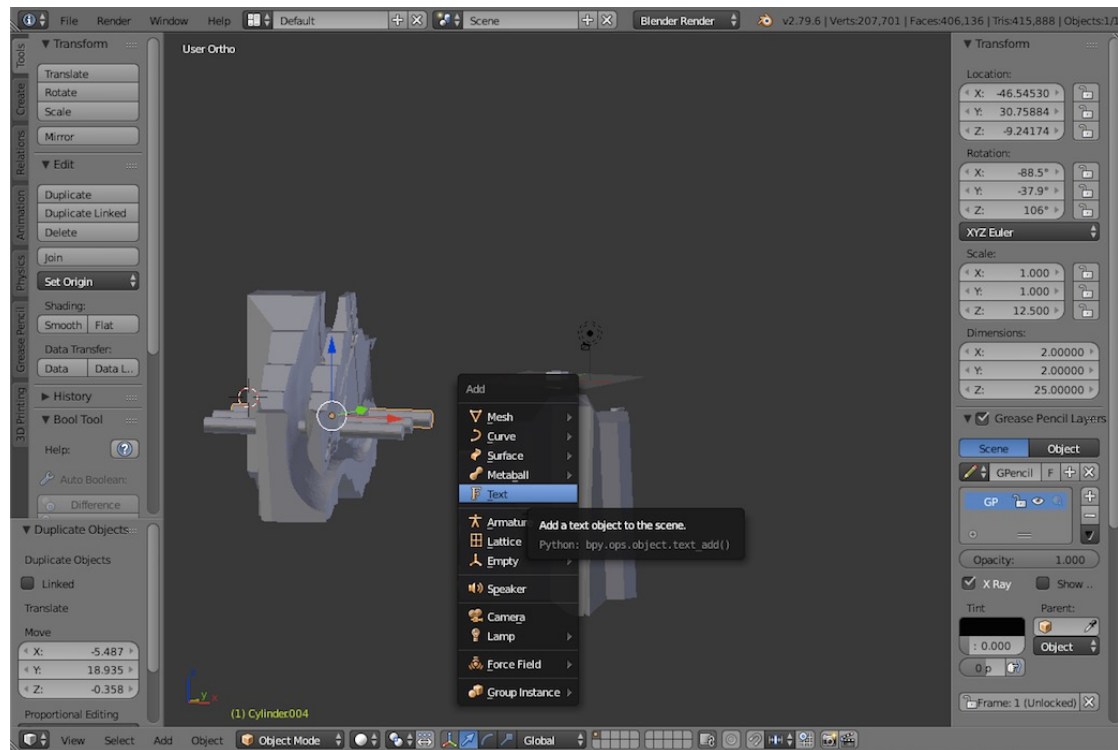

# Cutting guides – Labelling

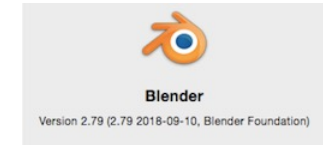

- Shift+A – Text
- *Edit Mode*: Modify text
- Extrude
- Position
- Transform Text into Mesh:
  - Alt+C – *Curves into Mesh*
- Boolean: Difference guide-text mesh

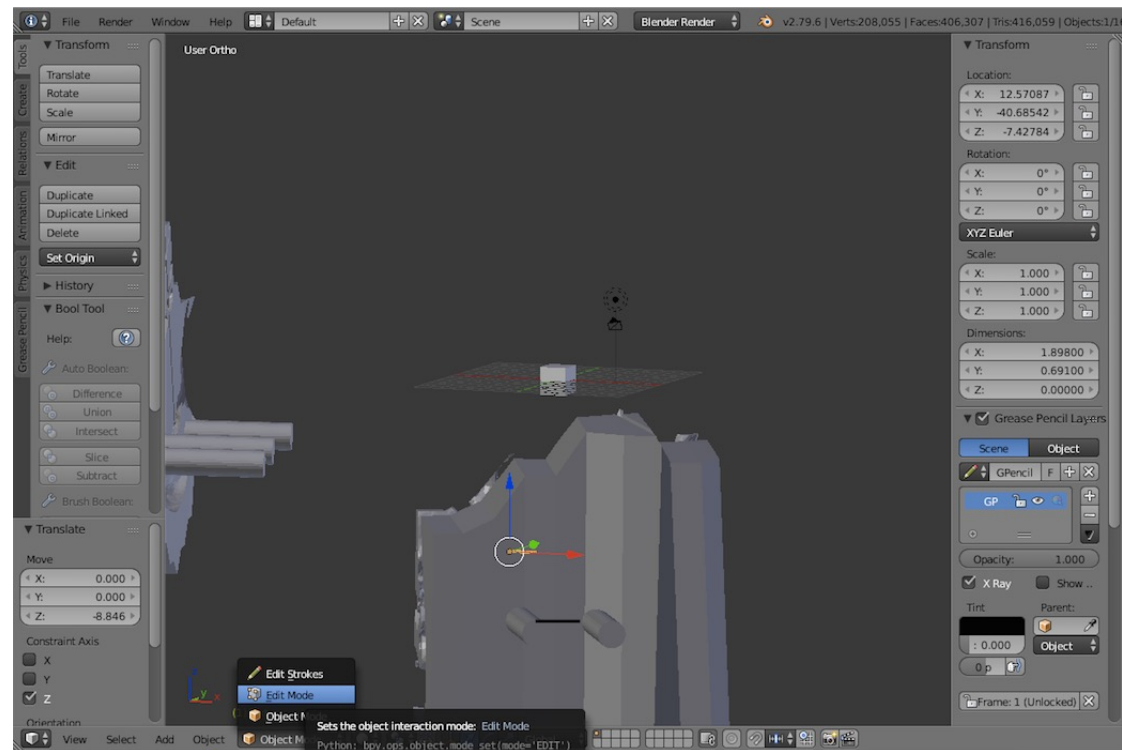

# Cutting guides – Labelling



- Shift+A – Text
- *Edit Mode*: Modify text
- Extrude
- Position
- Transform Text into Mesh:
  - Alt+C – *Curves into Mesh*
- Boolean: Difference guide-text mesh

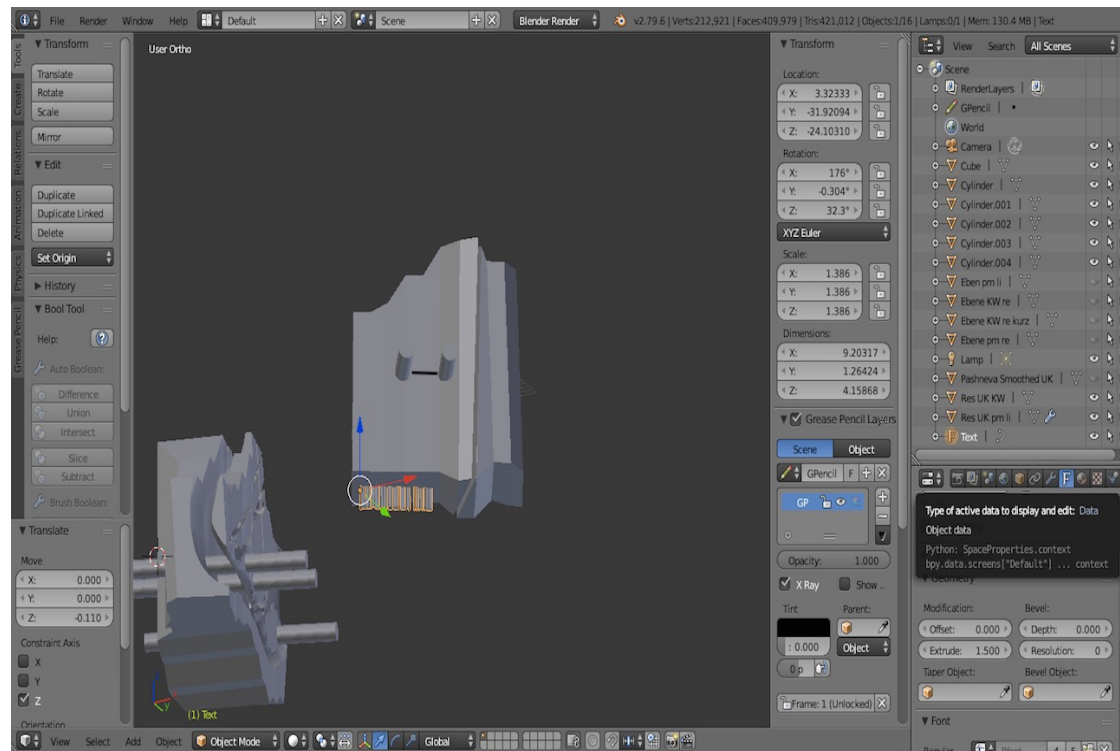

# Cutting guides – Labelling



- Shift+A – Text
- *Edit Mode*: Modify text
- Extrude
- Position
- Transform Text into Mesh:
  - Alt+C – *Curves into Mesh*
- Boolean: Difference guide-text mesh

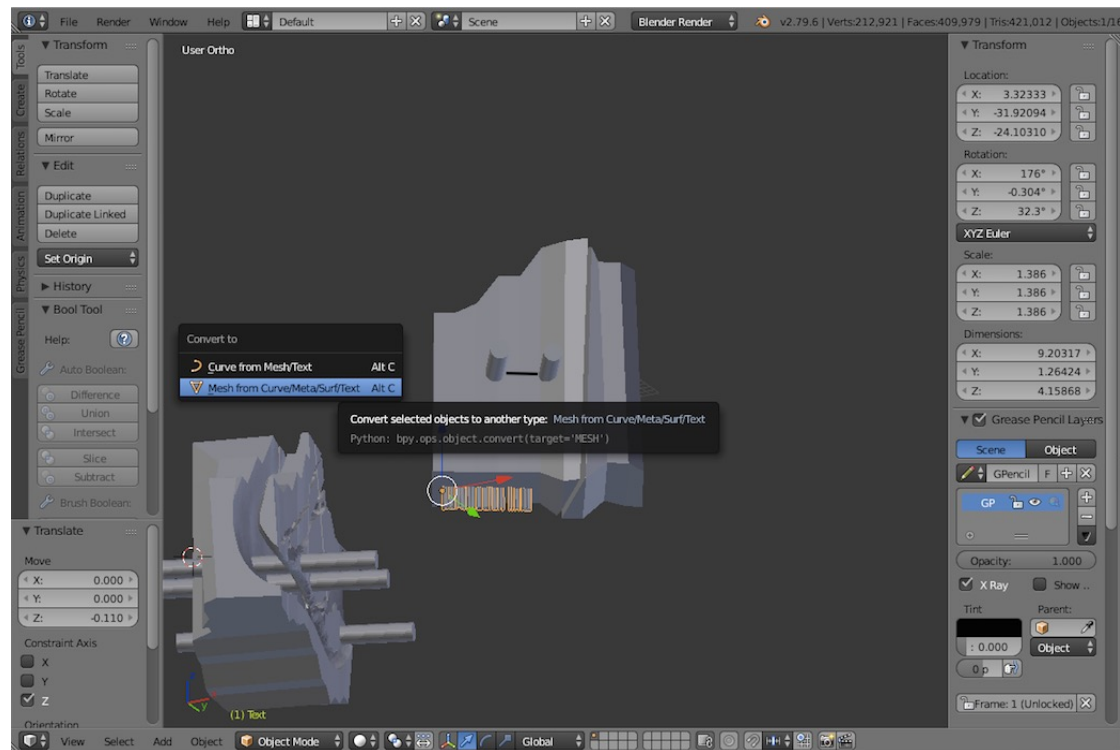

# Cutting guides – Labelling



- Shift+A – Text
- *Edit Mode*: Modify text
- Extrude
- Position
- Transform Text into Mesh:
  - Alt+C – *Curves into Mesh*
- Boolean: Difference guide-text mesh

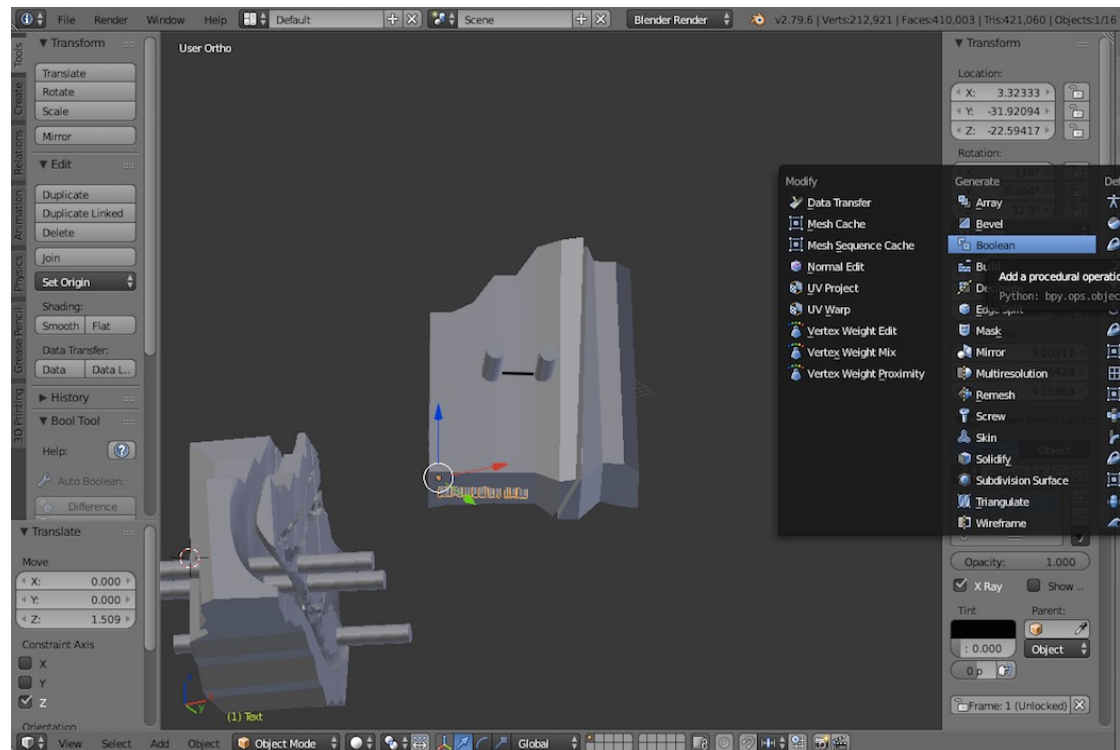

Supplement: DataSheet_2.pdf [file DataSheet_2.pdf]
