# Supplementary material for: In-House, Open-Source 3D-Software-Based, CAD/CAM-Planned Mandibular Reconstructions in 20 Consecutive Free Fibula Flap Cases: An Explorative Cross-Sectional Study With Three-Dimensional Performance Analysis
Source: PubMed Central journal article supplement (PMC8498593; doi:10.3389/fonc.2021.731336), 2021-09-24
Supplement: DataSheet_1.pdf [file DataSheet_1.pdf]

## Supplementary Table legends

**Supplement Table 1.** Intraclass correlation (ICC) coefficient (Cohen's kappa =  $\kappa$ ) to analyze the *intrarater* reliability of measurements performed by the two independent raters (PK and FDG) applying a two-way mixed model.

**Supplement Table 2.** Intraclass correlation (ICC) coefficient (Cohen's kappa =  $\kappa$ ) to analyze the *interrater* reliability of measurements performed by the two independent raters (PK and FDG) applying a two-way mixed model.

## List of Supplementary Tables

| <b>Supplementary Table 1.</b> Intraclass correlation (ICC) coefficient (Cohen's kappa = $\kappa$ ) to analyze the <i>intra-rater</i> reliability of measurements performed by the two independent raters (PK and FDG) applying a two-way mixed model. |                                         |                                         |
|-------------------------------------------------------------------------------------------------------------------------------------------------------------------------------------------------------------------------------------------------------|-----------------------------------------|-----------------------------------------|
| <i>Parameter</i>                                                                                                                                                                                                                                      | <i>Rater 1</i>                          | <i>Rater 2</i>                          |
|                                                                                                                                                                                                                                                       | <i>ICC <math>\kappa</math> (95% CI)</i> | <i>ICC <math>\kappa</math> (95% CI)</i> |
| <b>Pre head–head med</b>                                                                                                                                                                                                                              | 0.999 (0.990–0.999)                     | 0.988 (0.966–0.995)                     |
| <b>Pre head–head lat</b>                                                                                                                                                                                                                              | 0.999 (0.996–0.999)                     | 0.994 (0.986–0.998)                     |
| <b>Pre condyle angle right</b>                                                                                                                                                                                                                        | 0.747 (0.330–0.904)                     | 0.552 (-0.292–0.844)                    |
| <b>Pre condyle angle left</b>                                                                                                                                                                                                                         | 0.866 (0.655–0.948)                     | 0.693 (0.078–0.897)                     |
|                                                                                                                                                                                                                                                       |                                         |                                         |
| <b>Post cap–cap med</b>                                                                                                                                                                                                                               | 0.997 (0.985–0.999)                     | 0.963 (0.905–0.986)                     |
| <b>Post cap–cap lat</b>                                                                                                                                                                                                                               | 0.997 (0.992–0.999)                     | 0.998 (0.995–0.999)                     |
| <b>Post condyle angle right</b>                                                                                                                                                                                                                       | 0.861 (0.612–0.951)                     | 0.942 (0.840–0.979)                     |
| <b>Post condyle angle left</b>                                                                                                                                                                                                                        | 0.951 (0.839–0.983)                     | 0.945 (0.848–0.980)                     |
|                                                                                                                                                                                                                                                       |                                         |                                         |
| <b>Pre-virt RMSE</b>                                                                                                                                                                                                                                  | 0.958 (0.891–0.984)                     | 0.995 (0.988–0.998)                     |
| <b>Pre-virt MSD</b>                                                                                                                                                                                                                                   | 0.977 (0.940–0.991)                     | 0.999 (0.997–0.999)                     |
| <b>Pre-virt HD</b>                                                                                                                                                                                                                                    | 0.937 (0.835–0.976)                     | 0.967 (0.917–0.987)                     |
| <b>Virt-post RMSE</b>                                                                                                                                                                                                                                 | 0.959 (0.892–0.984)                     | 0.948 (0.867–0.979)                     |
| <b>Virt-post MSD</b>                                                                                                                                                                                                                                  | 0.964 (0.906–0.987)                     | 0.932 (0.827–0.973)                     |
| <b>Virt-post HD</b>                                                                                                                                                                                                                                   | 0.930 (0.812–0.974)                     | 0.937 (0.840–0.975)                     |
| <b>Pre-post RMSE</b>                                                                                                                                                                                                                                  | 0.998 (0.995–0.999)                     | 0.989 (0.972–0.995)                     |
| <b>Pre-post MSD</b>                                                                                                                                                                                                                                   | 0.996 (0.989–0.998)                     | 0.995 (0.987–0.998)                     |

|                                                                                                                                                                                                                                                                                                                                  |                     |                     |
|----------------------------------------------------------------------------------------------------------------------------------------------------------------------------------------------------------------------------------------------------------------------------------------------------------------------------------|---------------------|---------------------|
| <b>Pre-post HD</b>                                                                                                                                                                                                                                                                                                               | 0.998 (0.995–0.999) | 0.988 (0.971–0.995) |
| <p>Abbreviations:</p> <p>Head–head med/lat = medial/lateral horizontal distance between condylar heads; pre-virt = preoperative vs. virtual model; virt-post = virtual vs. postoperative model; pre-post = pre- vs. postoperative model; RMSE = root mean square error; MSD = mean surface distance; HD = Hausdorff distance</p> |                     |                     |

**Supplementary Table 2.** Intraclass correlation (ICC) coefficient (Cohen's kappa =  $\kappa$ ) to analyze the *interrater* reliability of measurements performed by the two independent raters (PK and FDG) applying a two-way mixed model.

| <i>Parameter</i>                | <i>ICC <math>\kappa</math></i> | <i>95% CI</i> |
|---------------------------------|--------------------------------|---------------|
| <b>Pre head–head med</b>        | 0.996                          | 0.990–0.998   |
| <b>Pre head–head lat</b>        | 0.997                          | 0.985–0.999   |
| <b>Pre condyle angle right</b>  | 0.845                          | 0.579–0.942   |
| <b>Pre condyle angle left</b>   | 0.907                          | 0.750–0.965   |
|                                 |                                |               |
| <b>Post cap–cap med</b>         | 0.993                          | 0.981–0.997   |
| <b>Post cap–cap lat</b>         | 0.999                          | 0.997–1.000   |
| <b>Post condyle angle right</b> | 0.926                          | 0.763–0.974   |
| <b>Post condyle angle left</b>  | 0.909                          | 0.755–0.967   |
|                                 |                                |               |
| <b>Pre-virt RMSE</b>            | 0.989                          | 0.973–0.996   |
| <b>Pre-virt MSD</b>             | 0.994                          | 0.985–0.998   |
| <b>Pre-virt HD</b>              | 0.976                          | 0.940–0.991   |
| <b>Virt-post RMSE</b>           | 0.985                          | 0.962–0.994   |
| <b>Virt-post MSD</b>            | 0.999                          | 0.997–1.000   |
| <b>Virt-post HD</b>             | 0.964                          | 0.909–0.986   |
| <b>Pre-post RMSE</b>            | 0.998                          | 0.994–0.999   |
| <b>Pre-post MSD</b>             | 0.995                          | 0.988–0.998   |
| <b>Pre-post HD</b>              | 0.990                          | 0.976–0.996   |
| Abbreviations:                  |                                |               |

Head-head med/lat = medial/lateral horizontal distance between condylar heads; pre-virt = preoperative vs. virtual model; virt-post = virtual vs. postoperative model; pre-post = pre- vs. postoperative model; RMSE = root mean square error; MSD = mean surface distance; HD = Hausdorff distance
